# Supplementary material for: Influence of Interferon-Alpha Combined with Chemo (Radio) Therapy on Immunological Parameters in Pancreatic Adenocarcinoma
Source: MDPI journal article supplement (doi:10.3390/ijms15034104), 2014-03-07
Supplement: s1 [file s1]

# Supplementary Information

**Figure S1.** Representative FACS picture of monocyte and DC analysis of one patient before and during IFN therapy. The percentage from total leukocytes is notified.

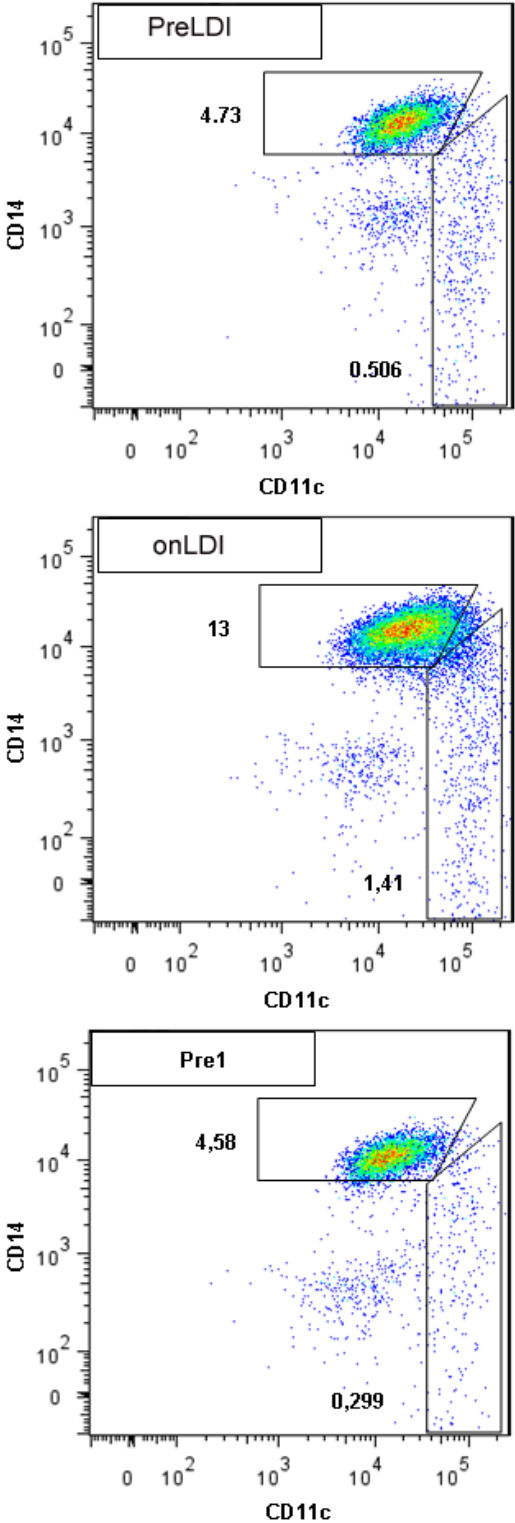

**Figure S2.** Representative pictures of FACS analysis of CD86 (left) and HLA-DR (right) expression of one patient before and during IFN therapy.

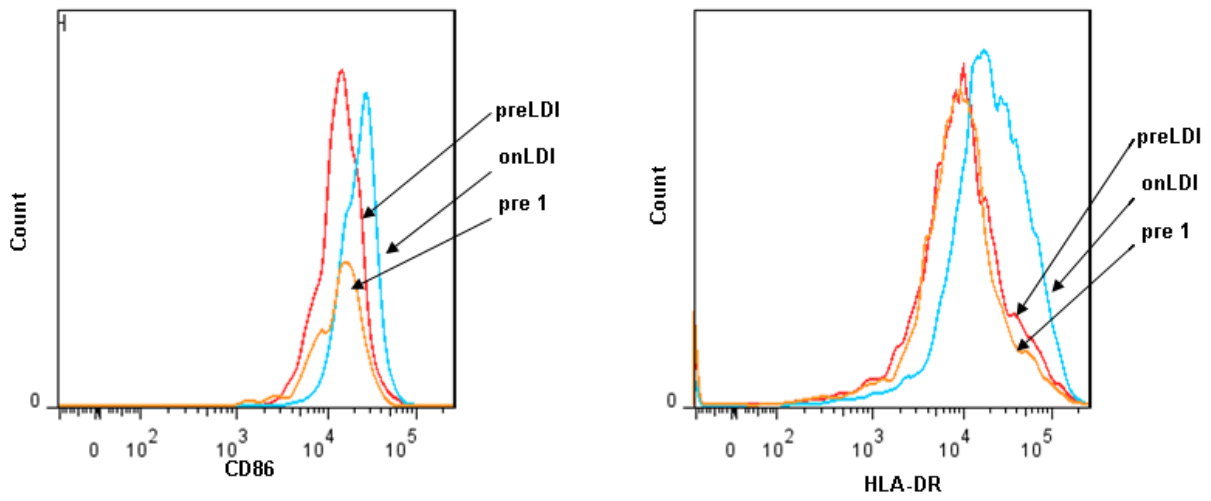

**Figure S3.** Expression of CTLA4 on the surface of CD4<sup>+</sup> cells during the course of IFN therapy. Immunological parameters of 17 patients were analyzed.

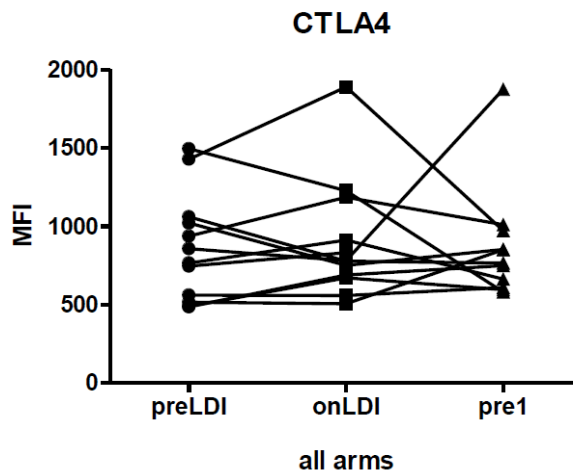

**Figure S4.** Representative pictures of FACS analysis of NKG2D on all NK cells (**upper panel**), on CD8<sup>-</sup> NK cells (**middle panel**) and on CD8<sup>+</sup> NK cells (**low panel**) of one patient before and during IFN therapy.

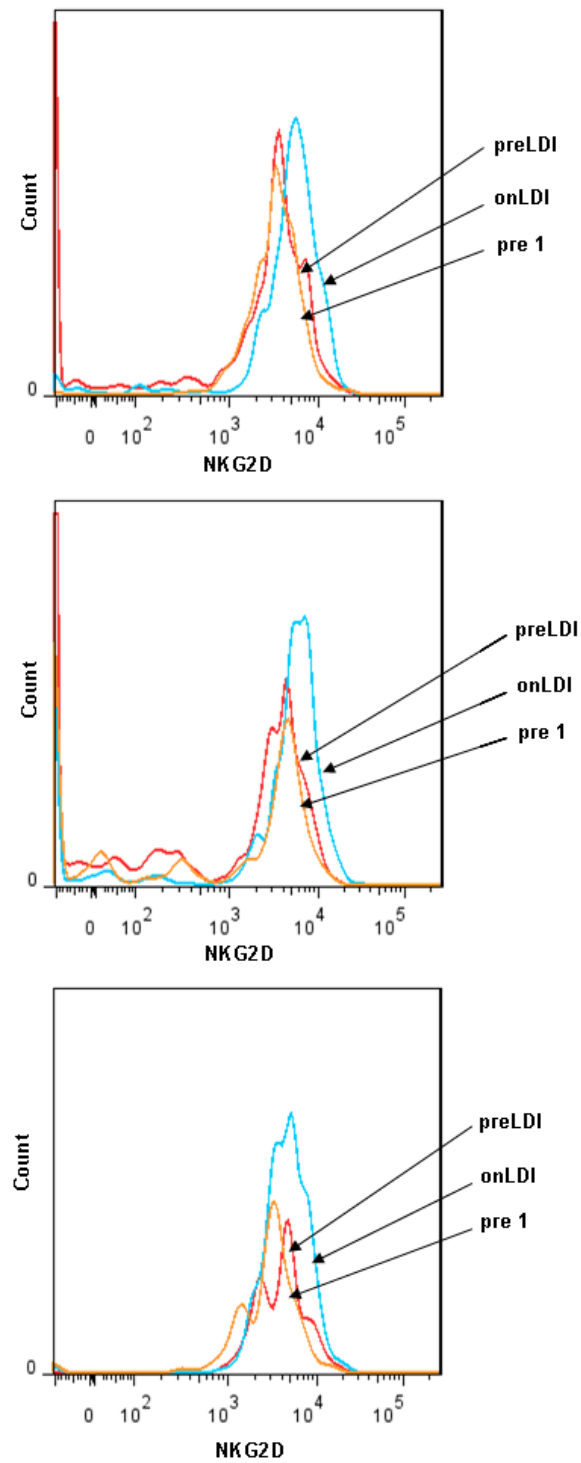

**Figure S5.** Leukocytes in all arms during the course of chemo-radio-immunotherapy. **(a)** Leukocyte count (clinical chemistry), no data for onLDI and end time-points; **(b)** FACS analysis of monocytes; for **(a)** and **(b)**: Arm A  $n = 5$ , Arm B and C  $n = 6$ ; **(c)** Relative amount of lymphocytes in all arms during the chemo-immunotherapy/chemo-radio-immunotherapy,  $n = 17$ , \*,  $p < 0.05$ .

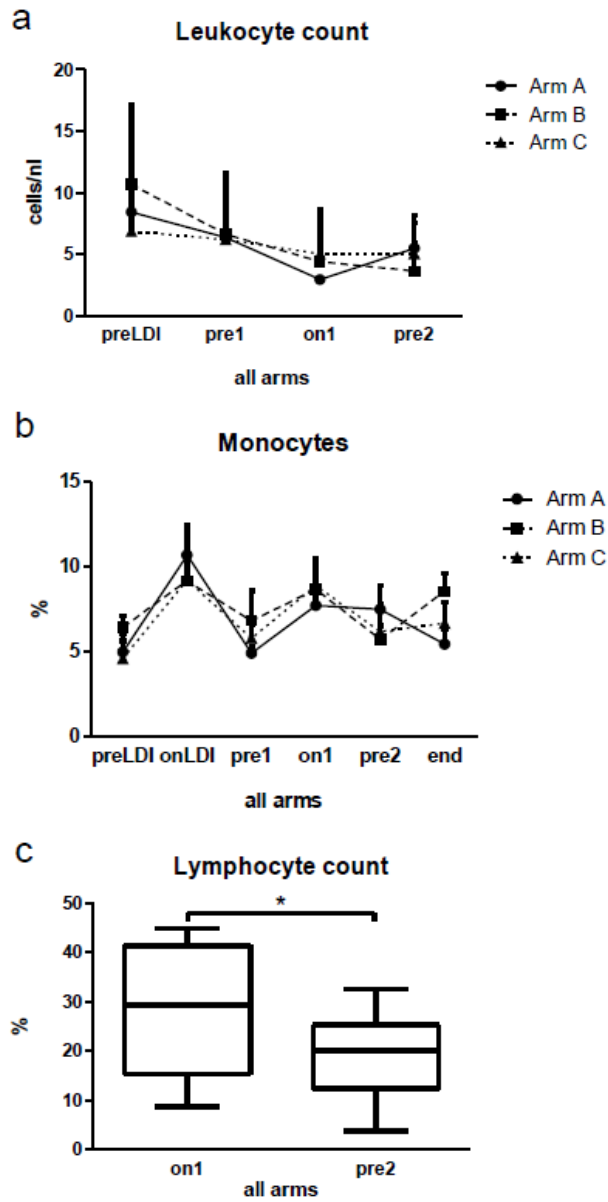

**Figure S6.** NK-cells: Expression of NKG2D on the surface of all CD45<sup>+</sup>CD56<sup>+</sup> cells (a); CD45<sup>+</sup>CD56<sup>+</sup>CD8<sup>-</sup> cells (b); and CD45<sup>+</sup>CD56<sup>+</sup>CD8<sup>+</sup> cells (c) in all arms during the course of chemo-radio-immunotherapy. Arm A *n* = 5, Arm B and C *n* = 6.

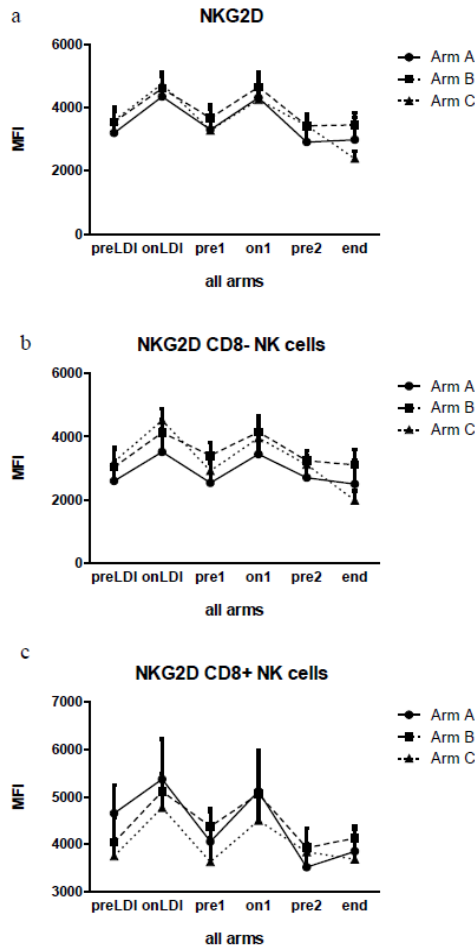

**Figure S7.** Tumor growth in Panc02 tumor-bearing mice treated with a combination of IFN and 5-FU. Six animals per group were analyzed, \*, *p* < 0.05.

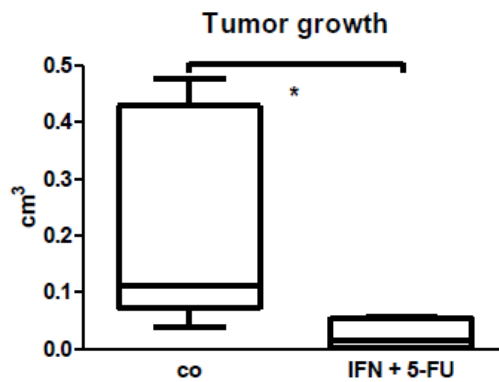

**Table S1.** Difference in patients' characteristics between study arms.

| Arm | Number of patients | Gender |   |          | Resection |    |          | Tumor grade |    |          | TNM |    |          | TNM |    |          | Relapse |    |          | 2-y survivor |          | 5-y survivor |          |        |
|-----|--------------------|--------|---|----------|-----------|----|----------|-------------|----|----------|-----|----|----------|-----|----|----------|---------|----|----------|--------------|----------|--------------|----------|--------|
|     |                    | M      | F | <i>p</i> | R0        | R1 | <i>p</i> | G2          | G3 | <i>p</i> | T2  | T3 | <i>p</i> | N0  | N1 | <i>p</i> | yes     | no | <i>p</i> | <i>n</i> (%) | <i>p</i> | <i>n</i> (%) | <i>p</i> |        |
| A   | 5                  | 4      | 1 | 0.89     | 0         | 5  | 0.39     | 5           | 0  | 0.89     | 1   | 5  | 0.69     | 0   | 1  | 0.47     | 3       | 2  | 0.94     | 1 (20)       | 0.4      | 0            | 0.22     |        |
| B   | 6                  | 4      | 2 |          | 2         | 4  |          | 4           | 1  |          | 0   | 6  |          | 0   | 6  |          | 4       | 2  |          | 5 (83)       |          | 9            |          | 2 (33) |
| C   | 6                  | 3      | 3 |          | 0         | 6  |          | 5           | 1  |          | 0   | 6  |          | 1   | 5  |          | 5       | 1  |          | 3 (50)       |          |              |          | 0      |

© 2014 by the authors; licensee MDPI, Basel, Switzerland. This article is an open access article distributed under the terms and conditions of the Creative Commons Attribution license (<http://creativecommons.org/licenses/by/3.0/>).
